# Supplementary material for: Azo-Linkage Redox Metal–Organic Framework Incorporating Carbon Nanotubes for High-Performance Aqueous Energy Storage
Source: MDPI journal article supplement (doi:10.3390/molecules28227479), 2023-11-08
Supplement: s1 [file s1]

# Azo-Linkage Redox Metal–Organic Framework Incorporating Carbon Nanotubes for High-Performance Aqueous Energy Storage

*Hualei Zhang<sup>1,2</sup>, Xinlei Wang<sup>1,2</sup>, Jie Zhou<sup>2</sup>, Weihua Tang<sup>1,2</sup>*

College of Materials, Xiamen University, Xiamen 361005, China

School of Chemistry and Chemical Engineering, Nanjing University of Science and  
Technology, Nanjing 210094, China

## Table of content

|                                                                |   |
|----------------------------------------------------------------|---|
| 1. Chemicals and materials.....                                | 2 |
| 2. Materials characterizations.....                            | 2 |
| 3. Electrochemical measurements.....                           | 3 |
| 4. FT-IR and XPS spectra.....                                  | 4 |
| 5. SEM and elemental mapping for MOFs.....                     | 5 |
| 6. HRTEM, HAADF and elemental mapping for CNTs@MOFs.....       | 6 |
| 7. TGA analysis.....                                           | 6 |
| 8. CV and GCD curves for MOFs and their hybrids with CNTs..... | 7 |
| 9. Cycling performance of SSC.....                             | 8 |

## 1. Chemicals and materials

N,N-dimethylformamide (DMF) was purchased from Energy Chemical Co., Ltd. Carboxylated single-walled carbon nanotubes (SWCNTs) (1~2 nm in diameter, 5~30  $\mu\text{m}$  in length) were obtained from XFNANO Materials Tech Co. Ltd. Zirconium (IV) tetrachloride, 3-aminobenzoic acid, 2-nitroterephthalic acid and 1-nitroanthraquinone were purchased from Shanghai Macklin Biochemical Co., Ltd. All the chemicals were used directly without further purification.

## 2. Materials characterizations

X-ray diffraction (XRD) patterns were recorded on Bruker D8 Advance X-ray diffractometer using Cu K $\alpha$  radiation ( $\lambda \approx 1.54 \text{ \AA}$ ) at 40 kV and 40 mA. Fourier Transform Infrared (FT-IR) transmission spectra were collected from a BRUKER-EQUINOX-55 IR spectrophotometer. Scanning electron microscopy (SEM) was performed on a FEI quanta 400 FEG. Transmission electron microscopy (TEM) was performed on a JEM F2100F. High resolution transmission electron microscopy (HR-TEM) was performed on a FEI Talos F200S. The thermogravimetric analysis (TGA) was operated on TA Instruments SDTA851e with the heating rate of  $10^\circ\text{C min}^{-1}$  in the range 50-800  $^\circ\text{C}$  under nitrogen atmosphere. The electric conductivity data was obtained from a RTS-8 four-probe tester. X-Ray photoelectron spectroscopy (XPS) measurements were performed with a Thermo ESCALAB 250 X-ray photonelectron spectrometer using Al K $\alpha$  radiation ( $h\nu \approx 1486.7 \text{ eV}$ ) as the excitation source. Prior to the BET measurements, the samples were outgassed for 10 hours at 100  $^\circ\text{C}$ .

Adsorption isotherms were calculated for nitrogen adsorption at 77 K and pressures up to 1 bar, measured by Brunauer-Emmet-Teller (BET) surface analyzer (Micromeritics, ASAP 2020).

### 3. Electrochemical measurements

All the electrochemical measurements were carried out on a CHI760D electrochemical workstation (Shanghai, China). The electrochemical performance of as-prepared electrodes was first evaluated in a three-electrode cell using aqueous 1 M H<sub>2</sub>SO<sub>4</sub> electrolyte, platinum foil as the counter electrode and Ag/AgCl as the reference electrode. The working electrodes were prepared by mixing active material (UiO-66-NO<sub>2</sub> or UiO-66-AQ), acetylene black, and poly(tetrafluoroethylene) (PTFE) with a weight ratio of 80:10:10 and pressing onto carbon cloth as the current collector. The as-prepared composite membrane with 1 cm × 1 cm size was used as self-standing working electrode.

The areal capacitance ( $C_A$ ) was calculated from GCD curves using the following equation:  $C_A = I \times \Delta t / (S \times \Delta V)$  (1)

where  $I$  is the current density,  $\Delta t$  is the discharge time,  $\Delta V$  is the voltage range, and  $S$  is the area of the entire electrode.

Energy density ( $E$ ) and power density ( $P$ ) of the symmetrical supercapacitor are calculated according to the following equations:

$$E = C_A \times (\Delta V)^2 / (2 \times 3600) \quad (2)$$

$$P = E \times 3600 / \Delta t \quad (3)$$

where  $C_A$  is the areal capacitance,  $\Delta V$  is the voltage window and  $\Delta t$  is the discharge time.

#### 4. FT-IR and XPS spectra

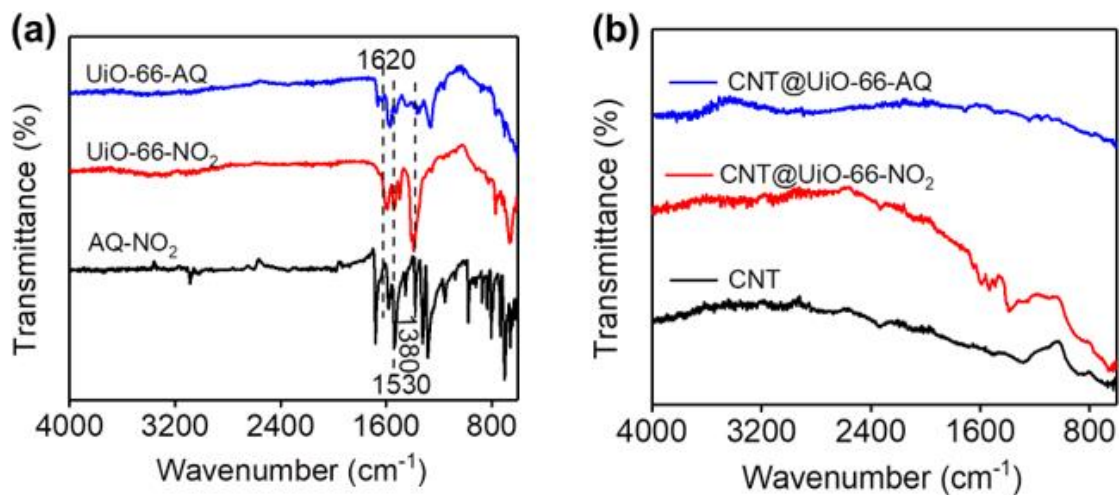

**Figure S1.** (a) FT-IR spectra of AQ-NO<sub>2</sub> and MOFs. (b) FT-IR spectra of CNT, CNT@UiO-66-NO<sub>2</sub> and CNT@UiO-66-AQ.

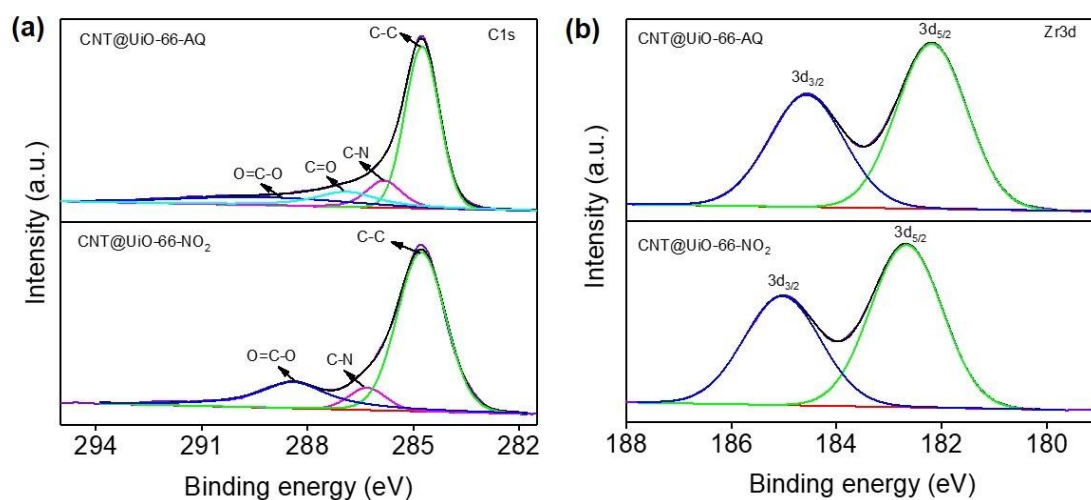

**Figure S2.** The comparison of (a) C 1s spectra and (b) Zr 3d spectra for CNT@UiO-66-NO<sub>2</sub> and CNT@UiO-66-AQ.

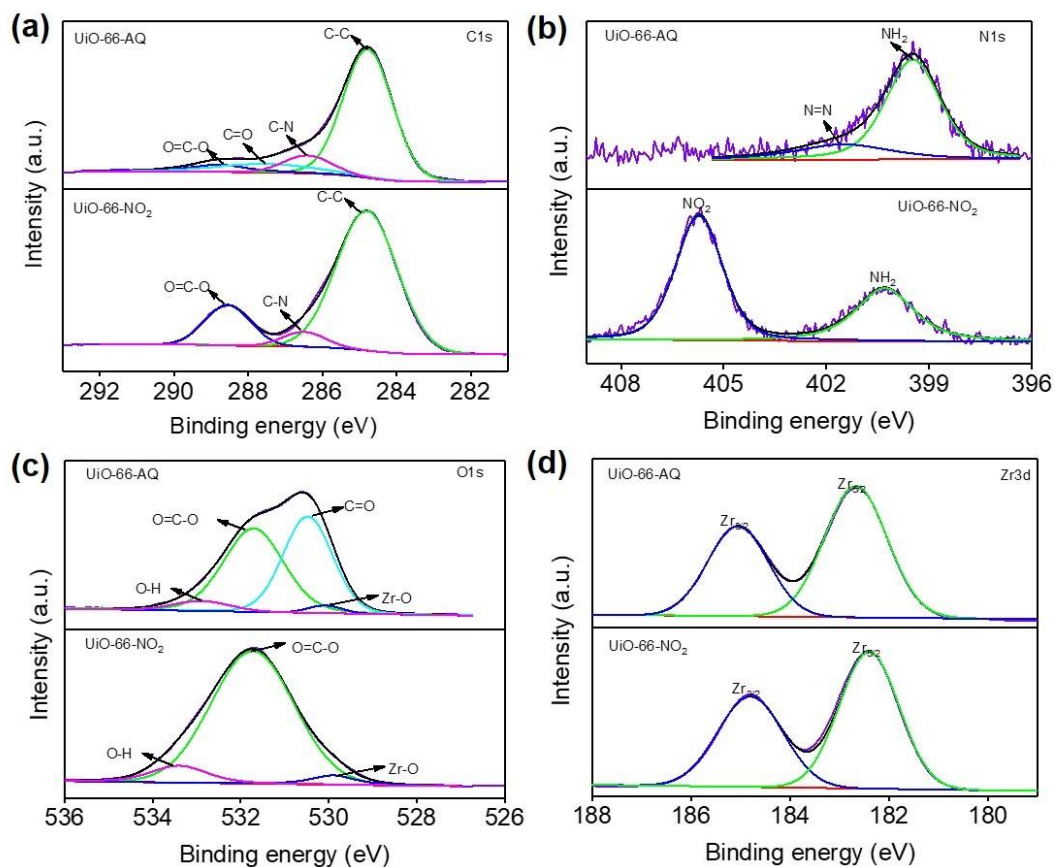

**Figure S3.** High-resolution XPS spectra of (a) C 1s, (b) N 1s, (c) O 1s and (d) Zr 3d for UiO-66-NO<sub>2</sub> and UiO-66-AQ powders.

## 5. SEM and elemental mapping for MOFs

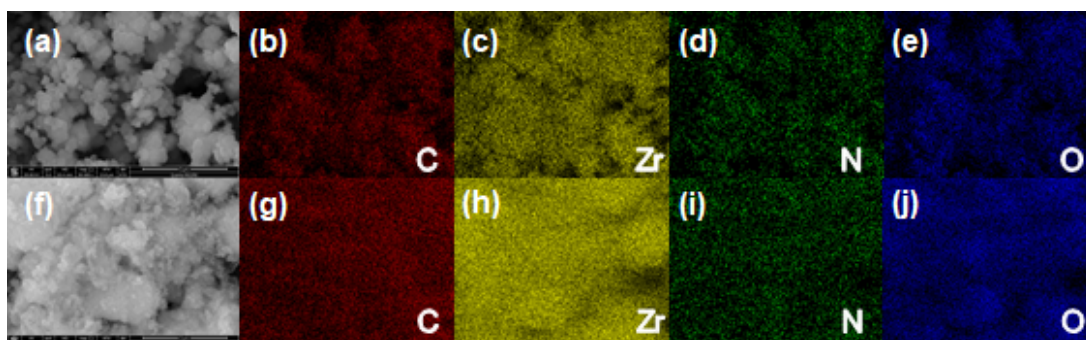

**Figure S4.** SEM image and the corresponding elemental (ca. C, Zr, N, and O) mapping images for (a-e) UiO-66-NO<sub>2</sub> and (f-j) UiO-66-AQ.

## 6. HRTEM, HAADF and elemental mapping for CNTs@MOFs

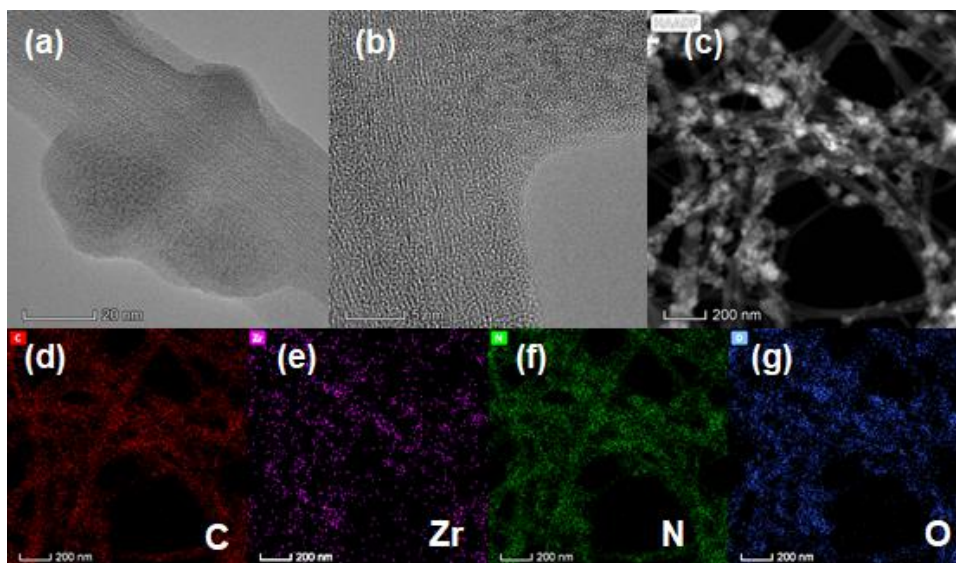

**Figure S5.** HRTEM images of (a,b) CNT@UiO-66-NO<sub>2</sub>. (e) HAADF image of CNT@UiO-66-NO<sub>2</sub> and (d-g) corresponding element mapping of C, Zr, N and O, respectively.

## 7. TGA analysis

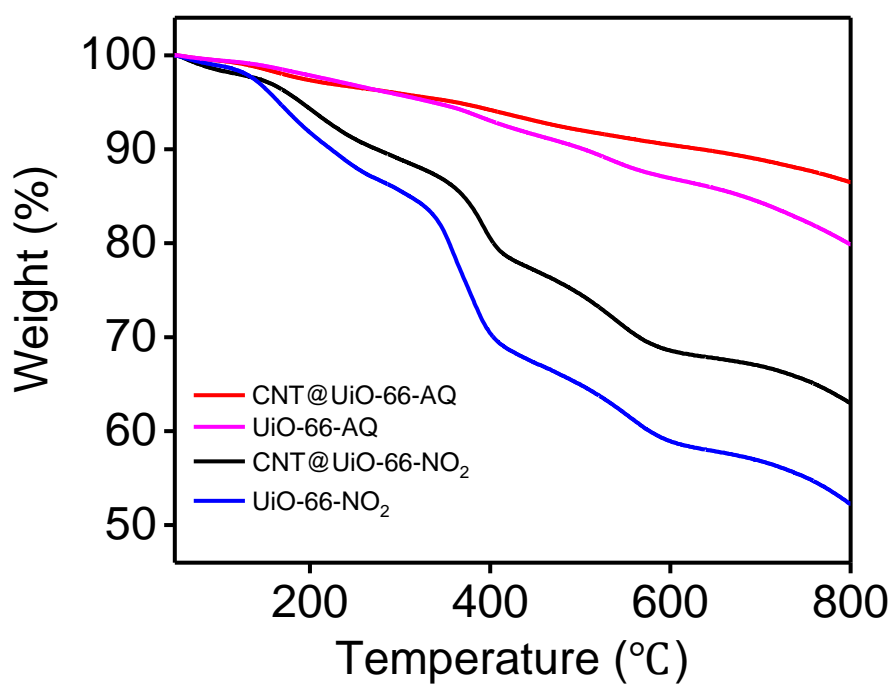

**Figure S6.** Comparison of TGA curves for MOFs and their hybrids with CNTs.

## 8. CV and GCD curves for MOFs and their hybrids with CNTs

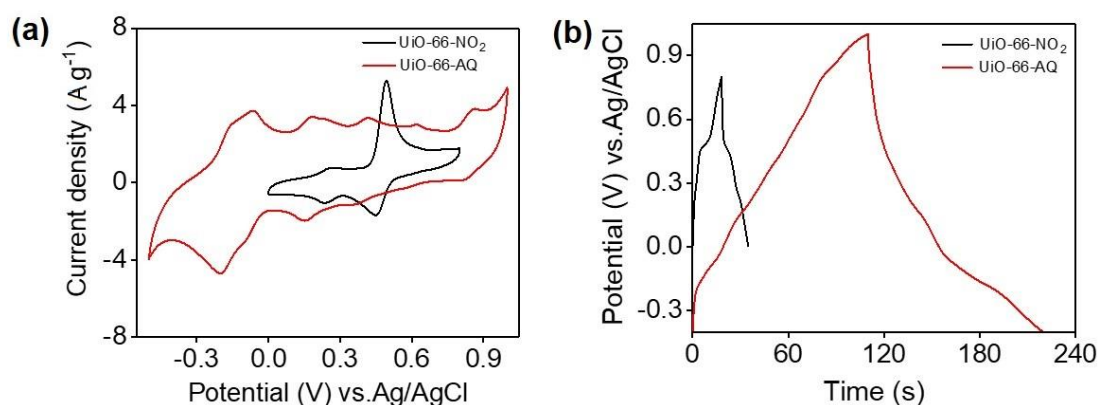

**Figure S7.** Electrochemical performance of powder electrodes UiO-66-NO<sub>2</sub> and UiO-66-AQ powders in a three-electrode configuration using 1 M H<sub>2</sub>SO<sub>4</sub> aqueous solution as electrolyte. (a) Cyclic voltammetry (CV) curves at the same scan rate of 30 mV s<sup>-1</sup>. (b) Galvanostatic charge/discharge (GCD) curves at a current density of 0.5 A g<sup>-1</sup>.

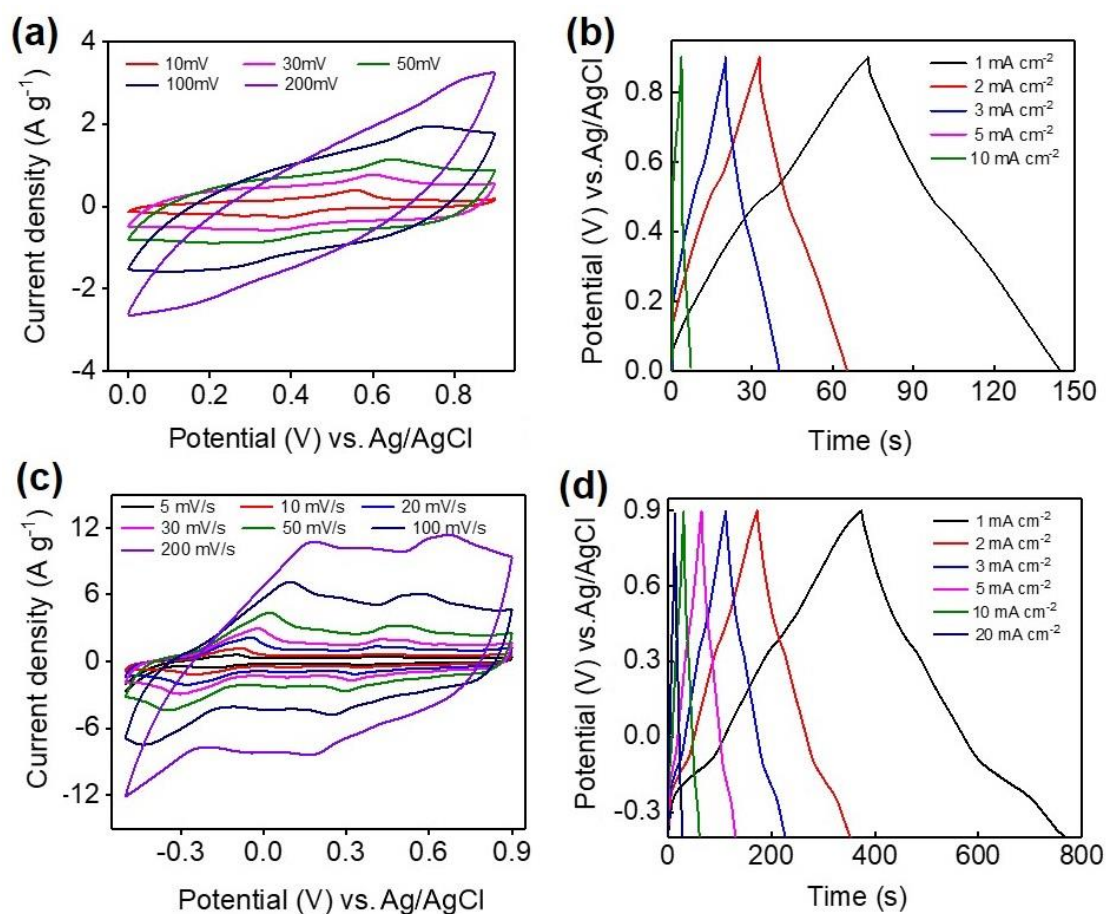

**Figure S8.** (a) CV curves and (b) GCD curves of CNT@UiO-66-NO<sub>2</sub>. (c) CV curves and (d) GCD curves of CNT@UiO-66-AQ.



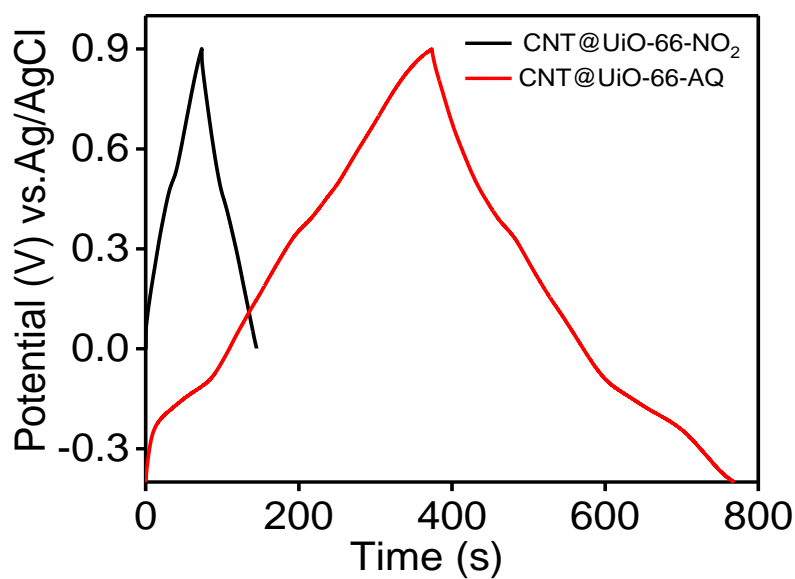

**Figure S9.** GCD curves of CNT@UiO-66-NO<sub>2</sub> and CNT@UiO-66-AQ at 1 mA cm<sup>-2</sup>.

### 9. Cycling performance of SSC

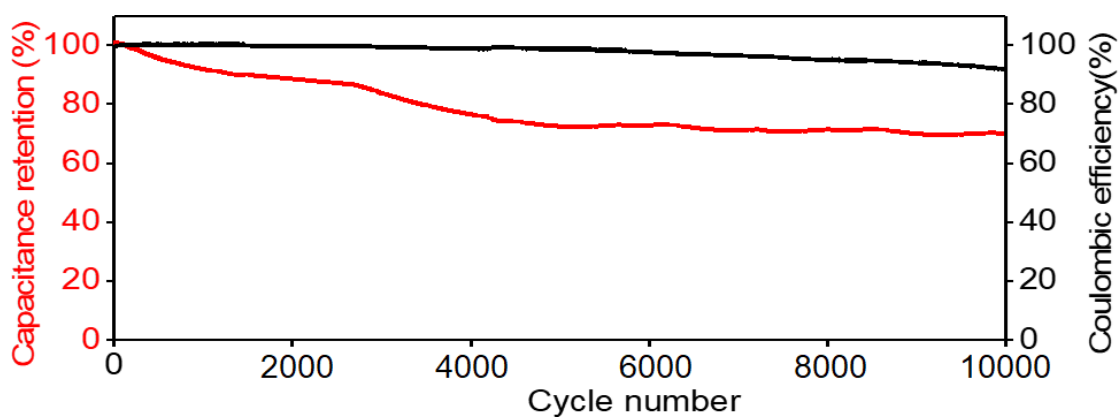

**Figure S10.** Cycling performance of CNT@UiO-66-AQ symmetric supercapacitor measured at 5 mA cm<sup>-2</sup> over 10000 cycles with corresponding coulombic efficiency.



This can be attributed to the extended voltage window and improved specific capacitance of CNT@UiO-66-AQ electrode. Representative device data (P, E) for the high-performance SSCs are listed as follows for comparison: NiCo-MOF/MWCNT (0.499 mW cm<sup>-2</sup>, 0.027 mWh cm<sup>-2</sup>) [39], CFs@UiO-66/PPy (0.26275 mW cm<sup>-2</sup>, 0.0128 mWh cm<sup>-2</sup>) [42], PET/MOF-1/rGO/PPy (0.03 mW cm<sup>-2</sup>, 0.0029 mWh cm<sup>-2</sup>) [43], ZIF-PPy (0.12 mW cm<sup>-2</sup>, 0.0113 mWh cm<sup>-2</sup>) [44], CNTs@Mn-MOF (0.12260 mW cm<sup>-2</sup>, 0.00699 mWh cm<sup>-2</sup>) [45], PANI-ZIF-67-CC (0.82 mW cm<sup>-2</sup>, 0.3396 mWh cm<sup>-2</sup>) [46], PANI/UiO-66 (0.05 mW cm<sup>-2</sup>, 0.0197 mWh cm<sup>-2</sup>) [47], Cu-CAT-NWAs/PPy (0.4 mW cm<sup>-2</sup>, 0.0224 mWh cm<sup>-2</sup>) [48].
